# Supplementary material
Source: publisher figshare collection journal article supplement (https://springernature.figshare.com/ndownloader/files/13875668)
Supplement: Supplementary file 1 [file 13875668]

Additional file

for the article

Nano- and Pheroid-technologies for development of foliar iron fertilizers and iron biofortification of soybean grown in South Africa

Jesper T.N. Knijnenburg1,2, Florentine M. Hilty1, Janro Oelofse3, Riaan Buitendag3, Michael B. Zimmermann1*, Ismail Cakmak4, and Anne F. Grobler5

1 ETH Zurich, Human Nutrition Laboratory, Institute of Food, Nutrition and Health, Department of Health Sciences and Technology, Schmelzbergstrasse 7, 8092 Zurich, Switzerland

2 Khon Kaen University, International College, 40002 Khon Kaen, Thailand

3 Biopher (Pty) Ltd., 5 Ednau Smallholdings, Abrahamskraal Road, Mooiwater, 9330 Bloemfontein, South Africa

4 Sabanci University, Faculty of Engineering and Natural Sciences, 34956 Istanbul, Turkey

5 North-West University, DST/NWU Preclinical Drug Development Platform, Faculty of Health Sciences, 2531 Potchefstroom, South Africa

Table S1. Average nutrient composition of upper fully developed leaves at the initial flowering stage (BBCH growth stage 69). The leaf sample was taken from a representative area outside the experimental area on the same day as application spray 1. The sufficiency range is taken from Small and Ohlrogge [1].

| **Nutrient** | **Measured**  **(g kg-1)** | **Sufficiency range**  **(g kg-1)** |
| --- | --- | --- |
| N | 47.9 | 46.2 – 55.0 |
| P | 4.2 | 2.6 – 5.0 |
| K | 32.0 | 17.1 – 25.0 |
| Ca | 15.2 | 3.6 – 20.0 |
| Mg | 5.4 | 2.6 – 10.0 |
| **Nutrient** | **Measured**  **(mg kg-1)** | **Sufficiency range**  **(mg kg-1)** |
| Na | 272 | - |
| Mn | 150 | 21 – 100 |
| Fe | 94 | 51 – 350 |
| Cu | 11 | 10 – 30 |
| Zn | 40 | 21 – 50 |
| B | 70 | 21 – 55 |
| S | 2.9 | - |


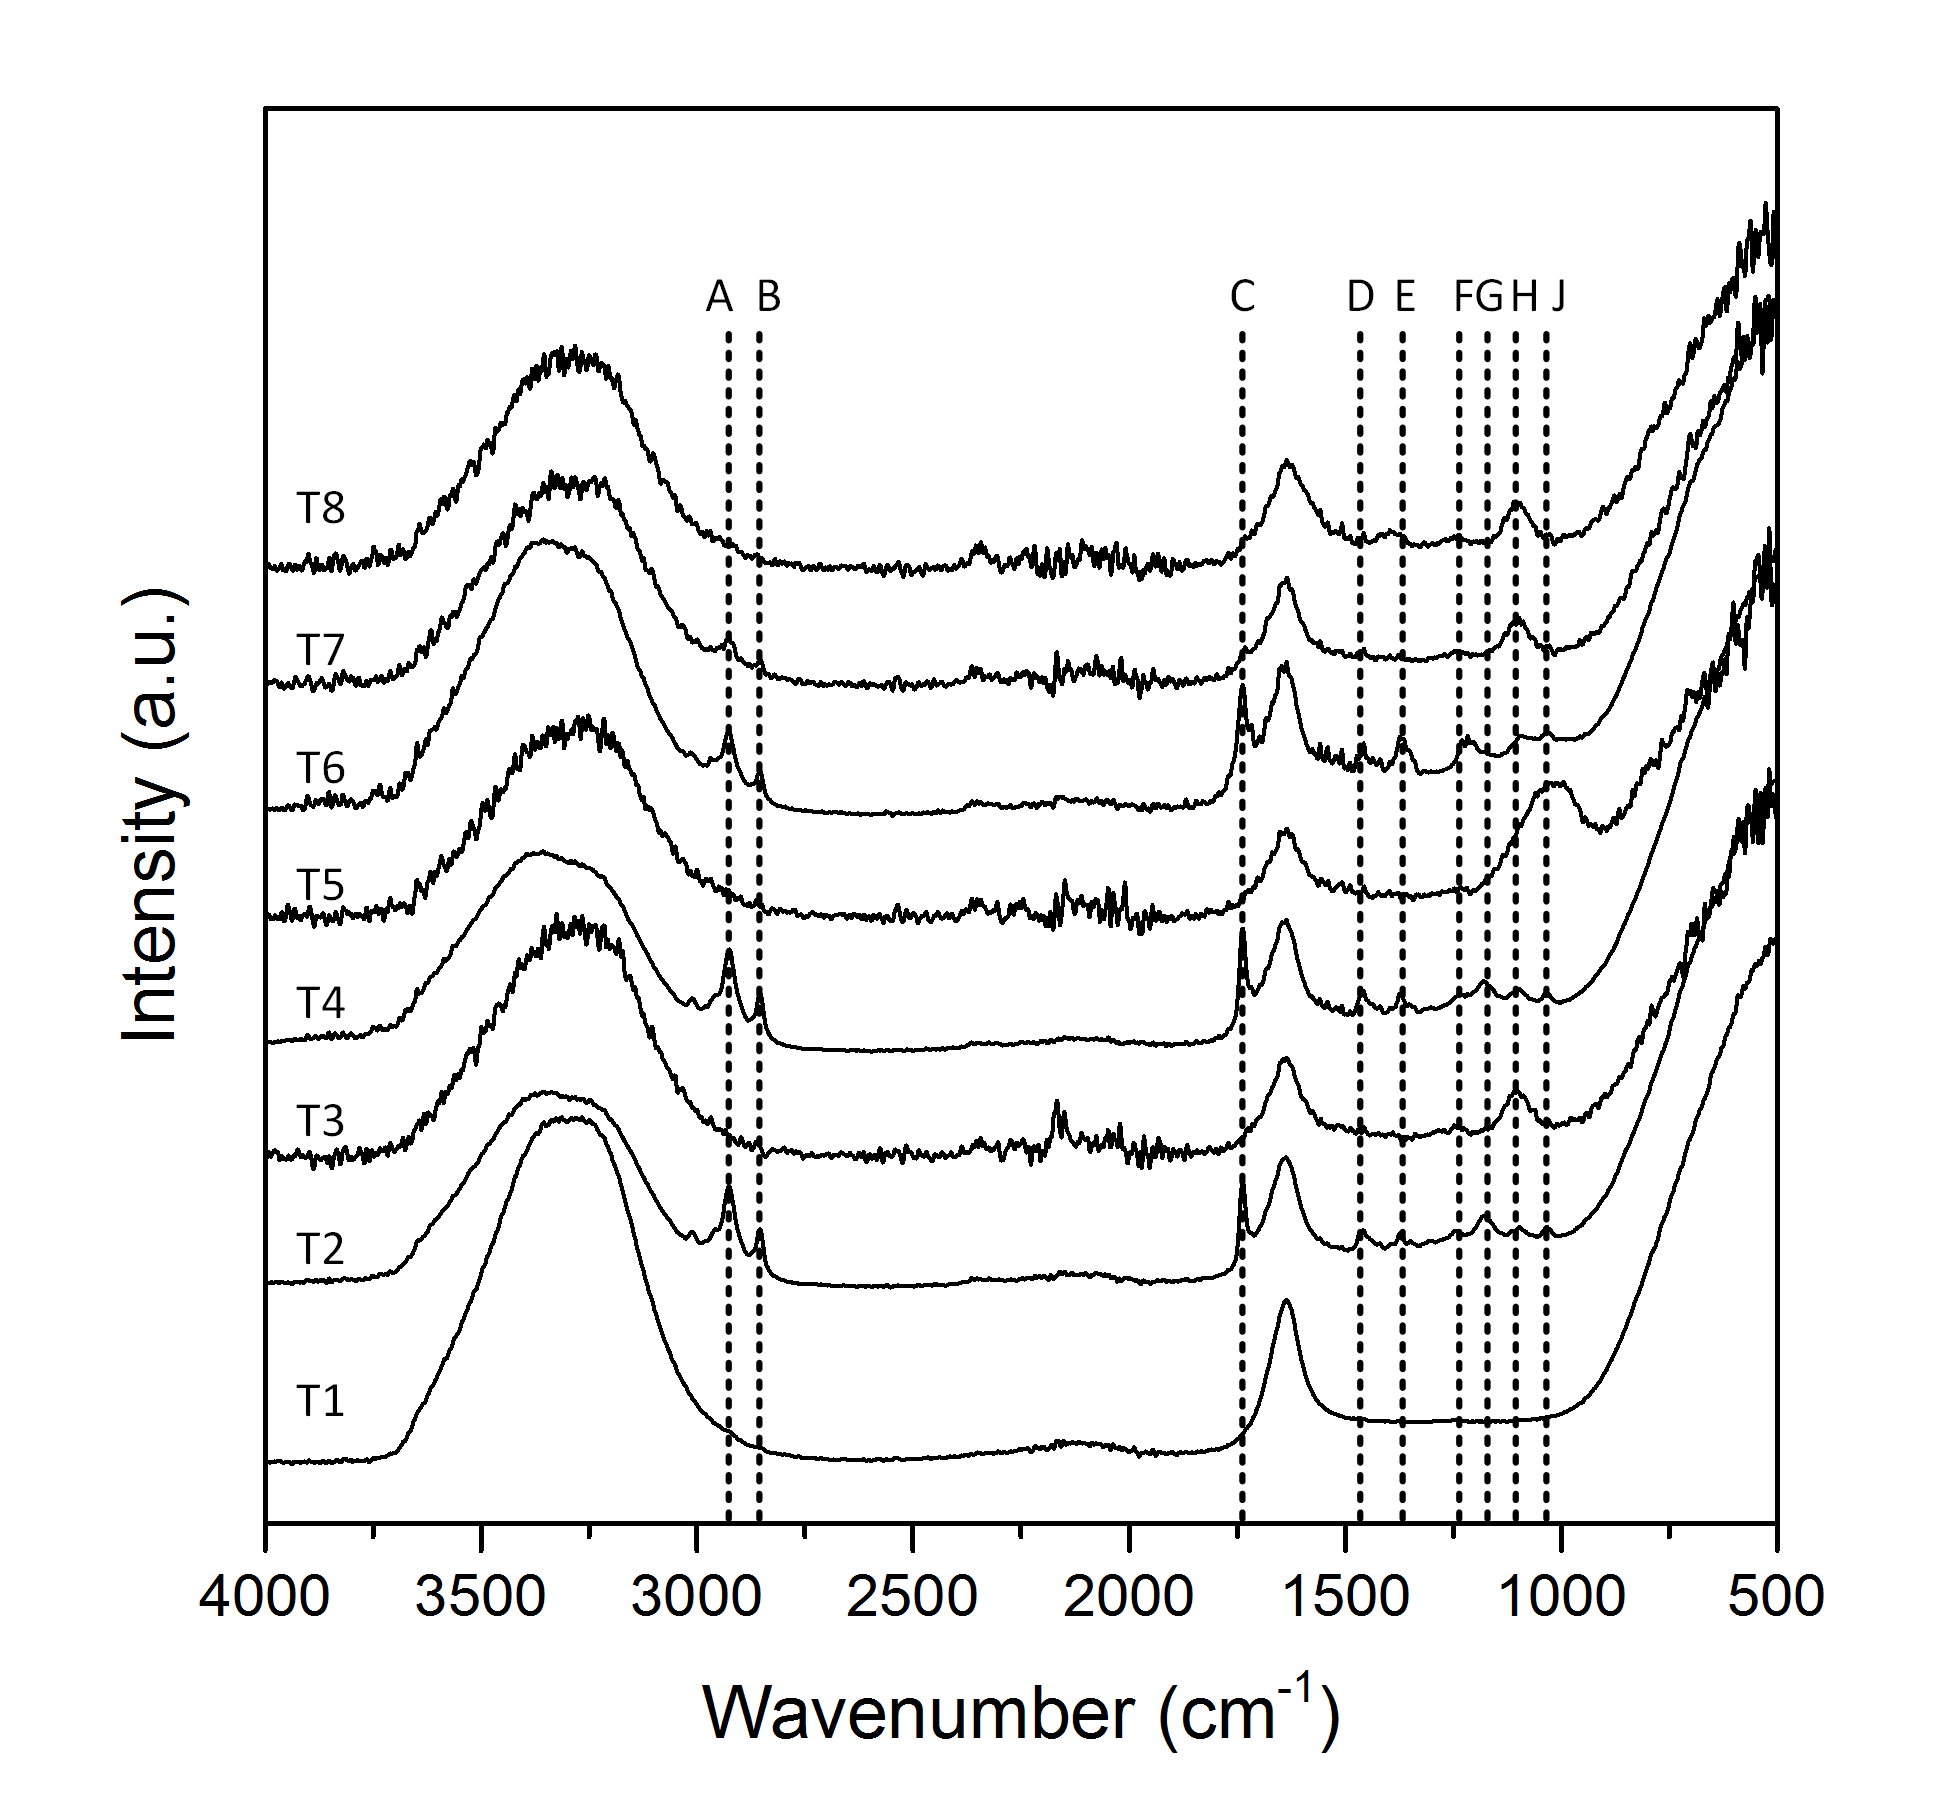


Figure S1. Absorbance FTIR spectra of the various applied foliar treatments T1-T8. Peak assignment for Pheroid compounds (T2, T4, and T6): A (2924 cm-1): C-H methylene asym str; B (2853 cm-1): C-H methylene sym str; C (1736 cm-1): C=O ester str; D (1462 cm-1): CH2 methylene sci; E (1373 cm-1): C-H methyl sym bend; F (1229 cm-1): C-O ester str; G (1178 cm-1): C-O ester str; H (1096 cm-1): C-O-C ether str (overlaps with SO42-). Peak assignment for non-Pheroid compounds: H (1096 cm-1): SO42- (overlaps with C-O-C ether); J (~900-1100 cm-1): PO43-. Peaks from water can be found around ~2800-3700 cm-1 and around ~1630 cm-1. Reference values were taken from Stuart [2].

# References

1. Small HGJ, Ohlrogge AJ. Plant analysis as an aid in fertilizing soybeans and peanuts. In: Walsh LM, Beaton JD, editors. Soil Testing and Plant Analysis. Revised ed. Madison, WI: Soil Science Society of America, Inc.; 1973. p. 315-27.

2. Stuart BH. Infrared spectroscopy: fundamentals and applications: John Wiley & Sons, Ltd; 2004.
